# Supplementary material for: Estimation of the fossil fuel component in atmospheric CO 2 based on radiocarbon measurements at the Beromünster tall tower, Switzerland
Source: Copernicus journal article supplement (doi:10.5194/acp-17-10753-2017), 2017-09-13
Supplement: Supplementary file 1 [file acp-17-10753-2017-supplement.zip]

## Supplementary Figures

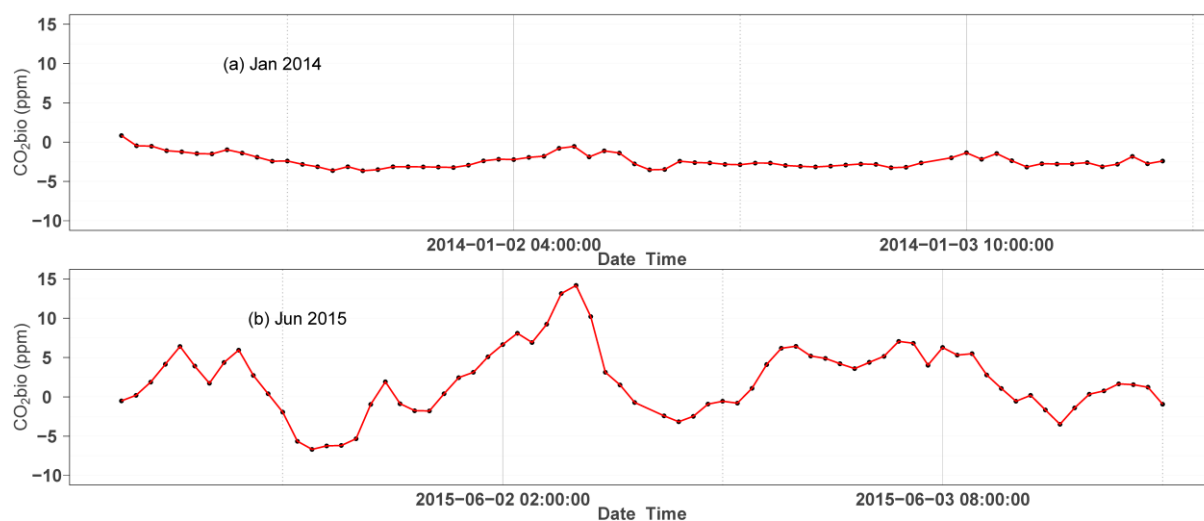

Figure S.1. Three days zoomed-in time series (hourly resolution) of the biospheric  $\text{CO}_2$  derived as a residual of the difference between the total  $\text{CO}_2$ ,  $\text{CO}_{2\text{bg}}$  and  $\text{CO}_{2\text{ff}}$  for all data for two periods in winter 2014 and summer 2015.
