# Supplementary material for: Estimation of the fossil fuel component in atmospheric CO 2 based on radiocarbon measurements at the Beromünster tall tower, Switzerland
Source: Copernicus journal article supplement (doi:10.5194/acp-17-10753-2017), 2017-09-13
Supplement: Supplementary file 2 [file acp-17-10753-2017-supplement.zip]

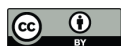

## *Supplement of*

# **Estimation of the fossil fuel component in atmospheric CO<sub>2</sub> based on radiocarbon measurements at the Beromünster tall tower, Switzerland**

**Tesfaye A. Berhanu et al.**

*Correspondence to:* Tesfaye A. Berhanu ([berhanu@climate.unibe.ch](mailto:berhanu@climate.unibe.ch))

- [acp-17-10753-2017-supplement-title-page.pdf](#)
- Supplementary files
  - [Supplementary Files.pdf](#)
  - [footprints\\_beromuenster.zip](#)

The copyright of individual parts of the supplement might differ from the CC BY 3.0 License.
